# Supplementary material for: Anionic dopant–dispersants for synthesis of polypyrrole coated carbon nanotubes and fabrication of supercapacitor electrodes with high active mass loading
Source: Royal Society of Chemistry journal article supplement (doi:10.1039/c4ta02117g), 2014-07-10
Supplement: c4ta02117g1.pdf [file c4ta02117g1.pdf]

## Supporting information

### **Anionic dopants-dispersants for synthesis of polypyrrole coated carbon nanotubes and fabrication of supercapacitor electrodes with high active mass loading**

Yeling Zhu, Kaiyuan Shi and Igor Zhitomirsky\*

Department of Materials Science and Engineering

McMaster University

1280 Main Street West

Hamilton, Ontario, Canada

L8S 4L7

\*E-mail: [zhitom@mcmaster.ca](mailto:zhitom@mcmaster.ca)

Phone: 1- (905) 525 – 9140

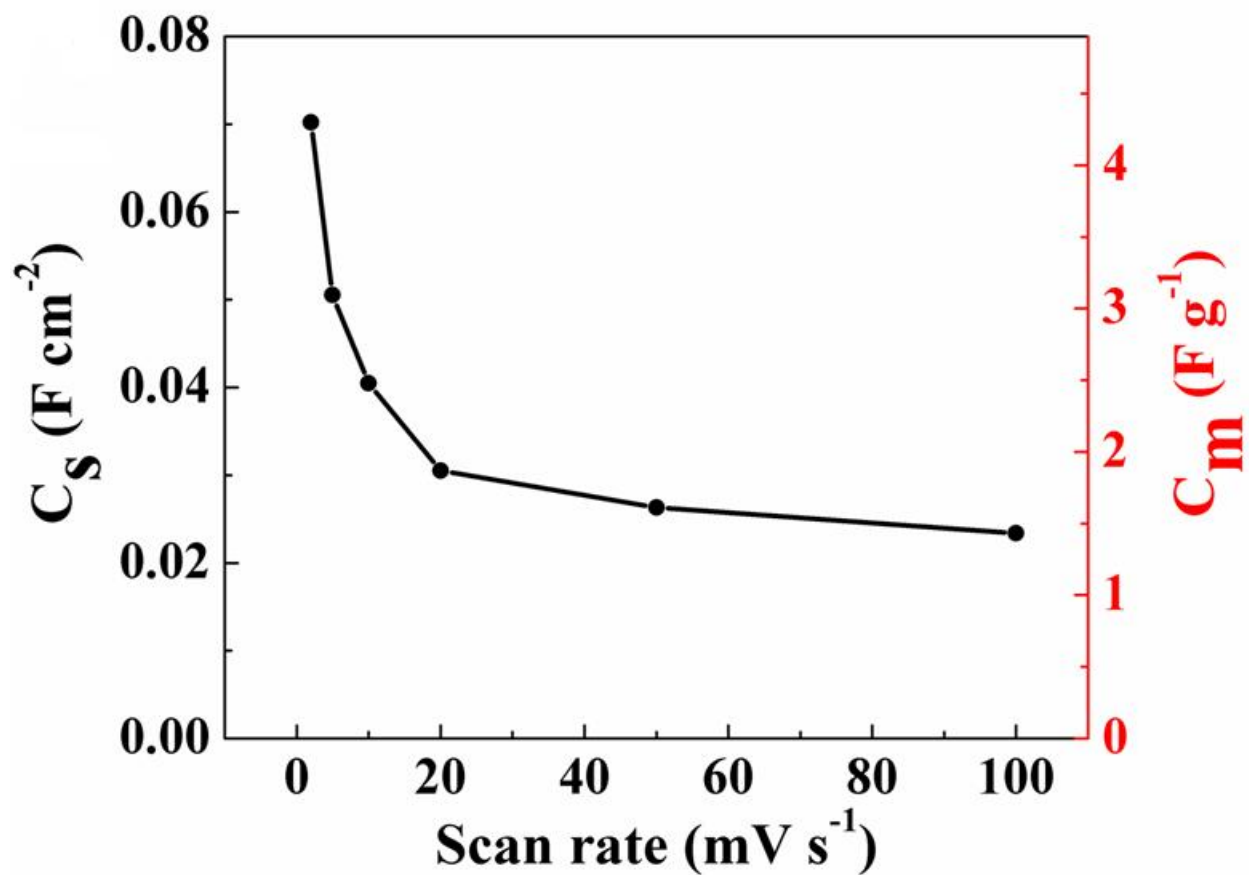

Fig.S1. Specific capacitance versus scan rate for MWCNT electrodes with active mass loading of  $18 \text{ mg cm}^{-2}$ .

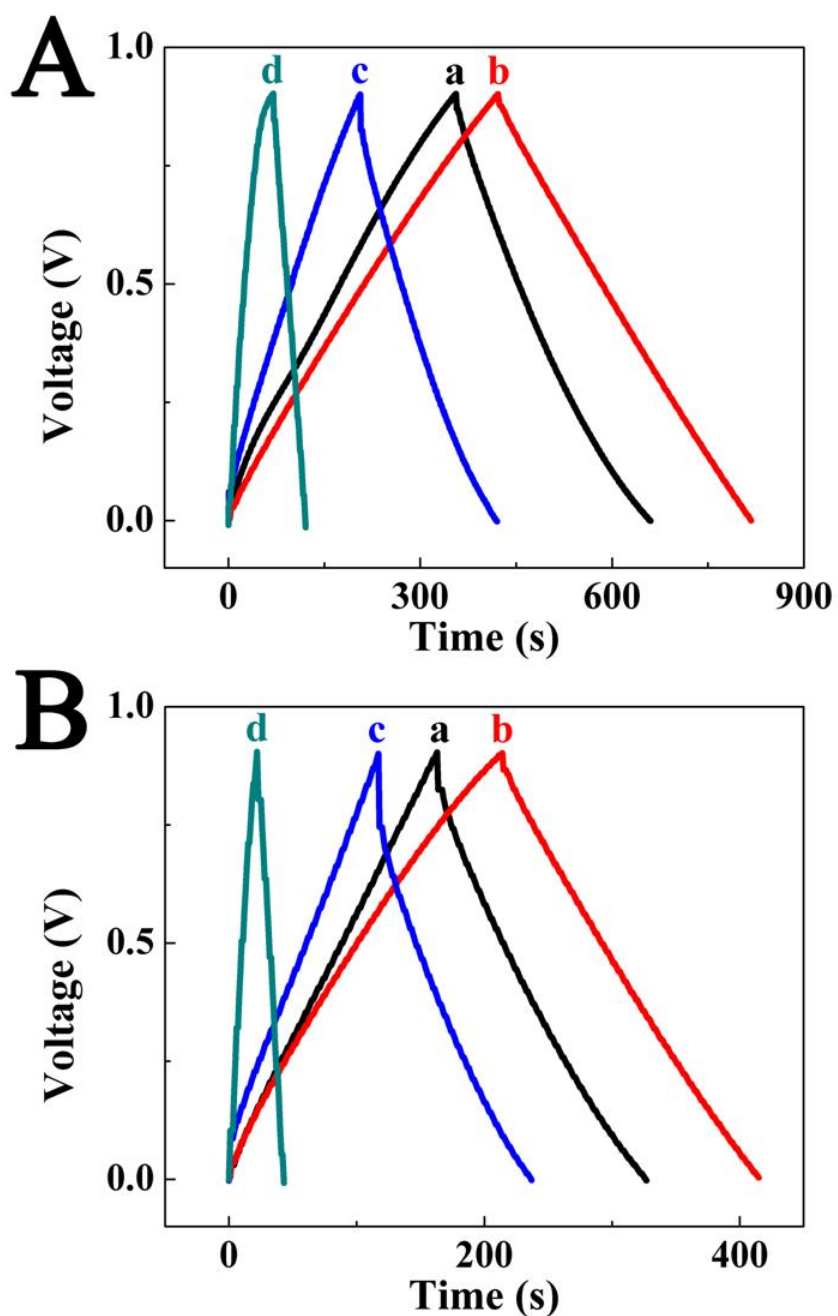

Fig S2. Charge-discharge behavior at current densities of (A)  $2 \text{ mA cm}^{-2}$  and (B)  $4 \text{ mA cm}^{-2}$  for ES cells, fabricated from (a) PPy - MWCNT with PV dopant, (b) PPy - MWCNT with ECR dopant, (c) PPy - MWCNT with AF dopant, (d) PPy - MWCNT without dopant.

The ES cells, prepared using ECR showed longer discharge time, indicating higher capacitance.

The capacitances at a current density of  $4 \text{ mA cm}^{-2}$  were found to be  $0.71 \text{ F cm}^{-2}$  ( $47.4 \text{ F g}^{-1}$ ),  $0.92 \text{ F cm}^{-2}$  ( $61.3 \text{ F g}^{-1}$ ),  $0.52 \text{ F cm}^{-2}$  ( $35.0 \text{ F g}^{-1}$ ),  $0.10 \text{ F cm}^{-2}$  ( $6.8 \text{ F g}^{-1}$ ) for ES cells, fabricated from PPy - MWCNT with PV dopant, PPy - MWCNT with ECR dopant, PPy - MWCNT with AF dopant, PPy - MWCNT without dopant, respectively.
